# Supplementary material for: Speciation trajectories in recombining bacterial species
Source: PubMed Central journal article supplement (PMC5542674; doi:10.1371/journal.pcbi.1005640), 2017-07-03
Supplement: pcbi.1005640.s002.pdf [file pcbi.1005640.s002.pdf]

**A** Habitat overlap 20%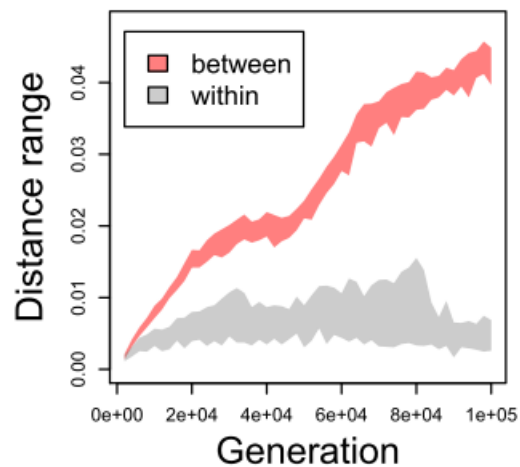**B** Habitat overlap 40%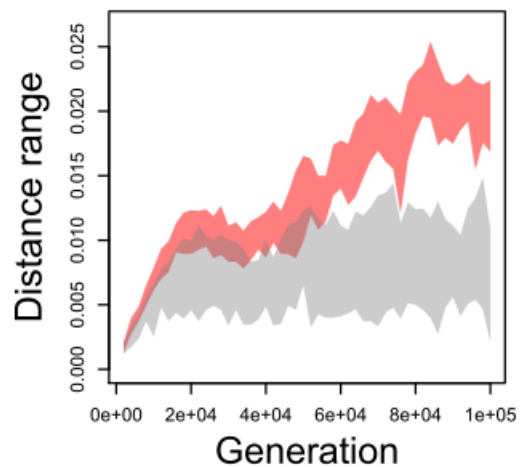**C** Habitat overlap 60%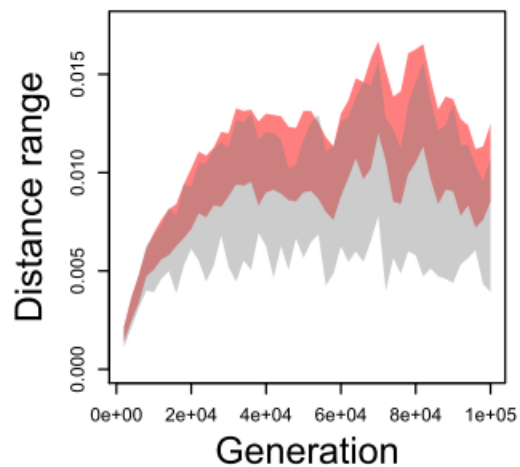

Run= 2

**D**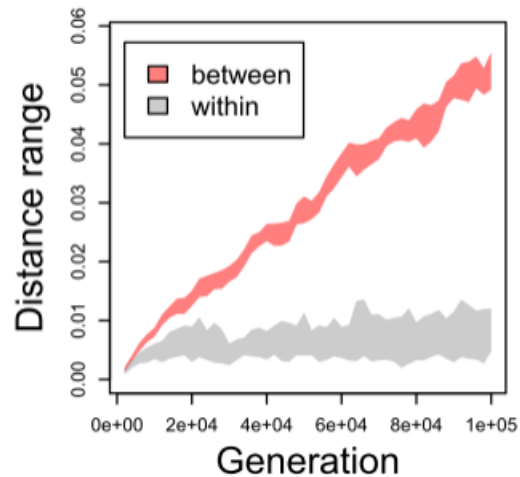**E**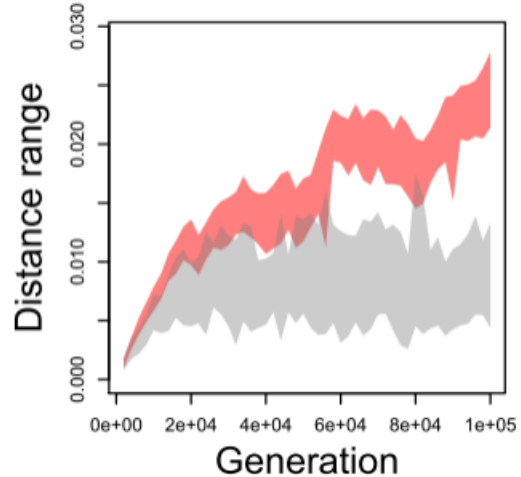**F**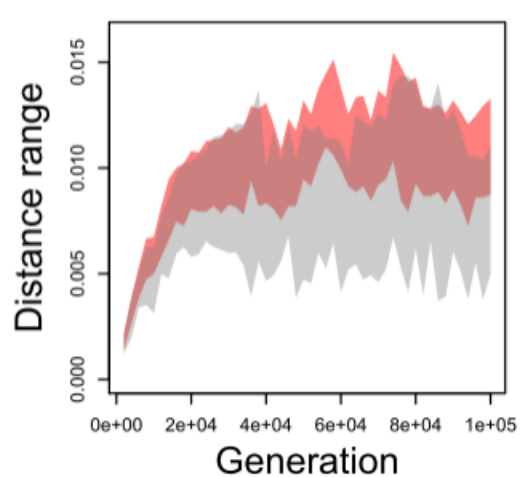

Run= 3
