# Supplementary material for: Speciation trajectories in recombining bacterial species
Source: PubMed Central journal article supplement (PMC5542674; doi:10.1371/journal.pcbi.1005640), 2017-07-03
Supplement: pcbi.1005640.s003.pdf [file pcbi.1005640.s003.pdf]

**Habitat overlap 20%**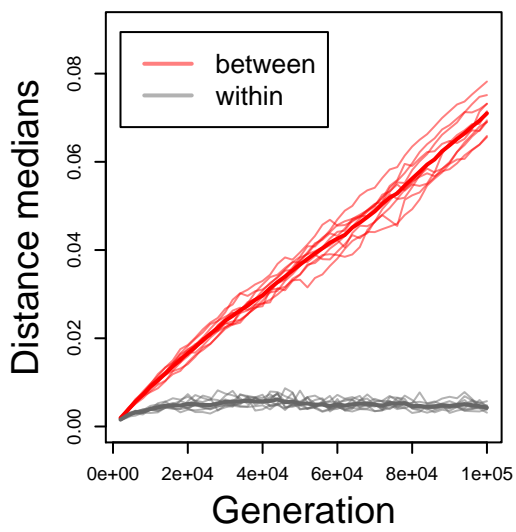**Habitat overlap 40%**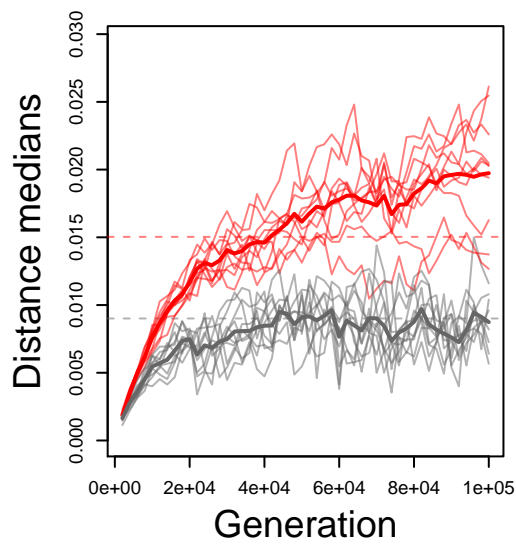**Habitat overlap 60%**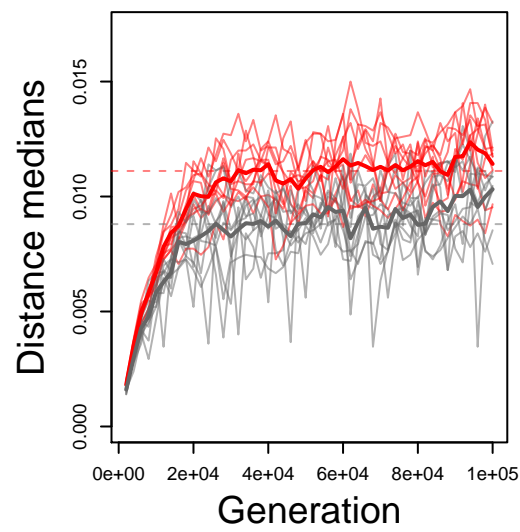**Migration 0.001**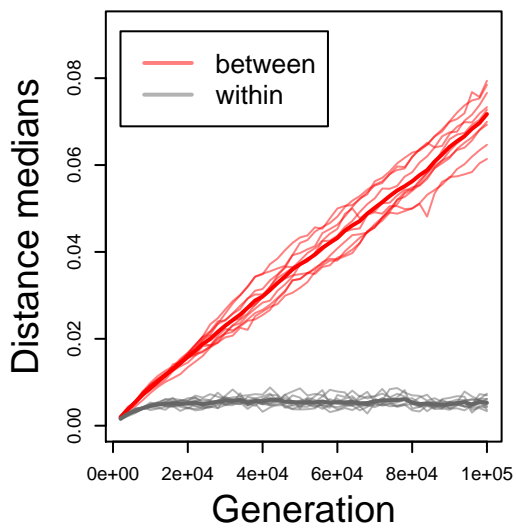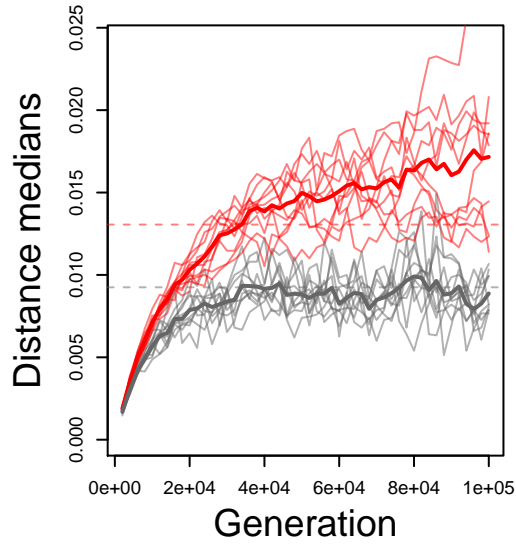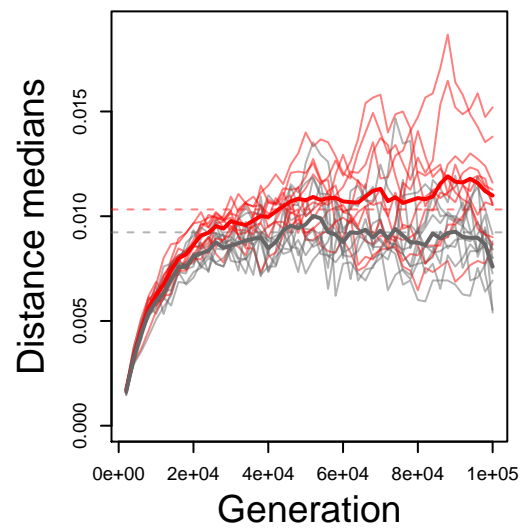**Migration 0.01**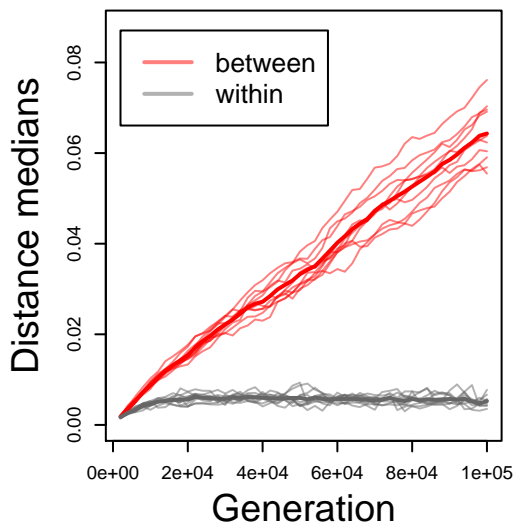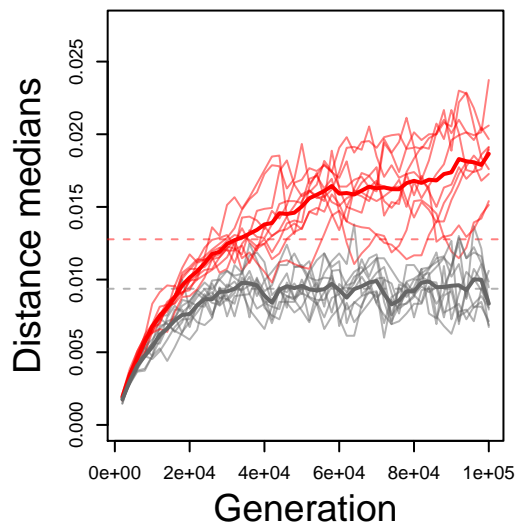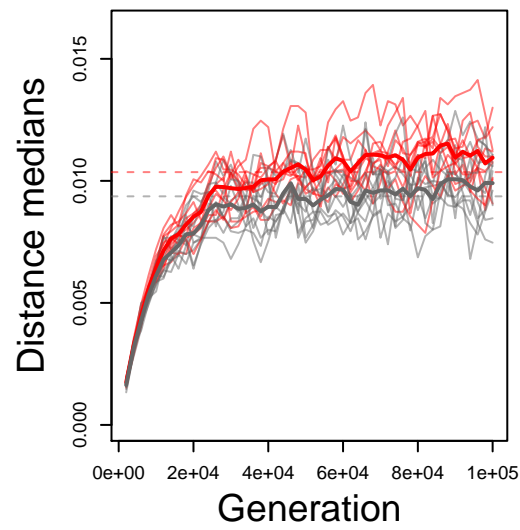**Migration 0.1**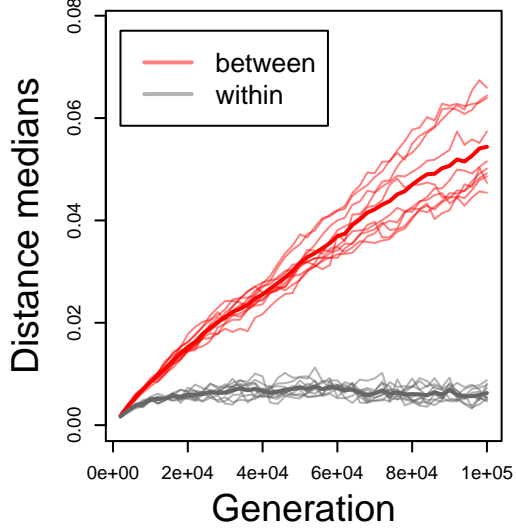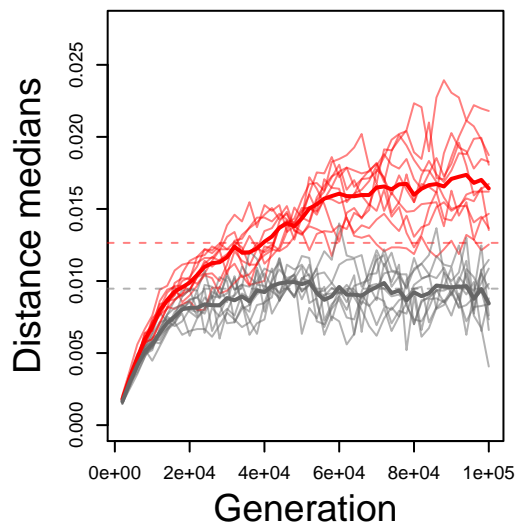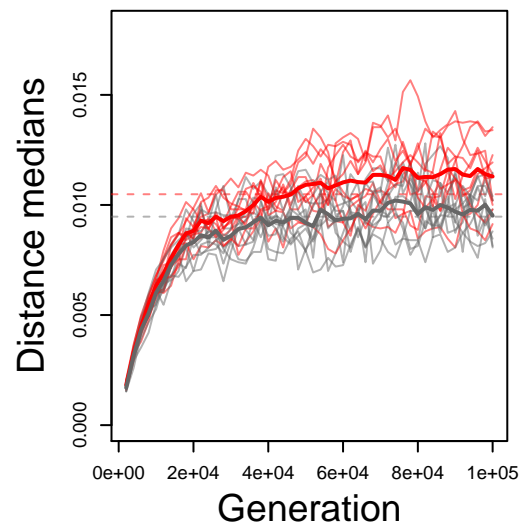**Migration 0.25**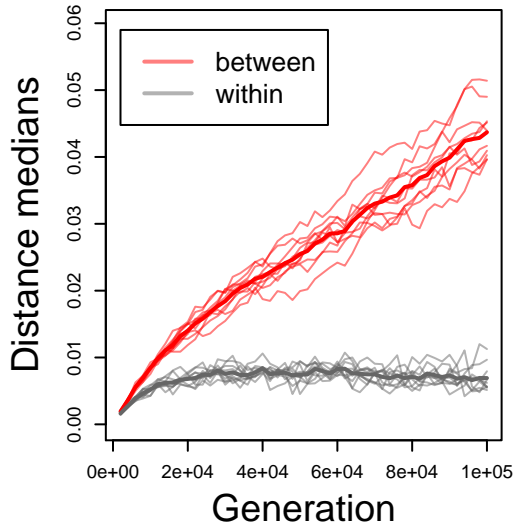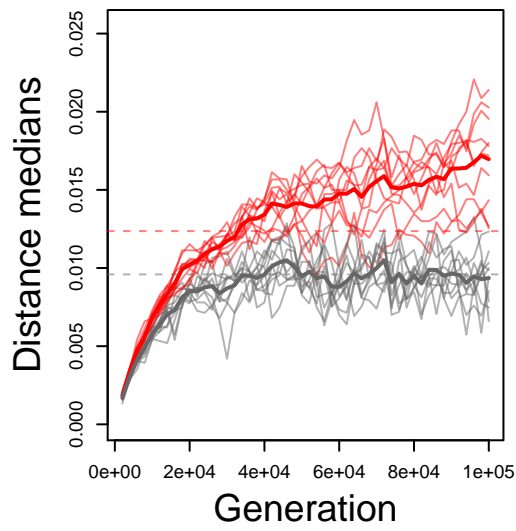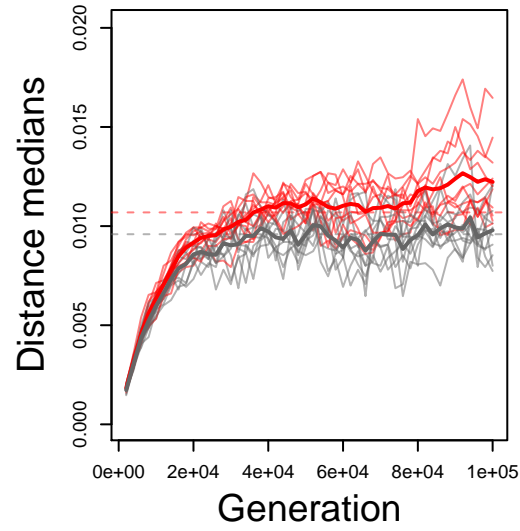**Migration 0.8**
