# Supplementary material for: Speciation trajectories in recombining bacterial species
Source: PubMed Central journal article supplement (PMC5542674; doi:10.1371/journal.pcbi.1005640), 2017-07-03
Supplement: pcbi.1005640.s005.pdf [file pcbi.1005640.s005.pdf]

### Habitat overlap 20%

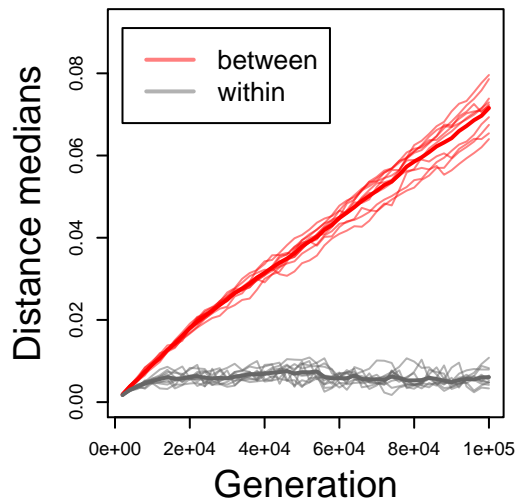

### Habitat overlap 40%

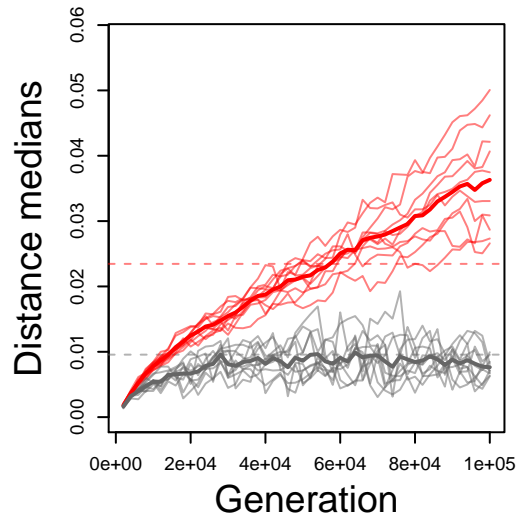

### Habitat overlap 60%

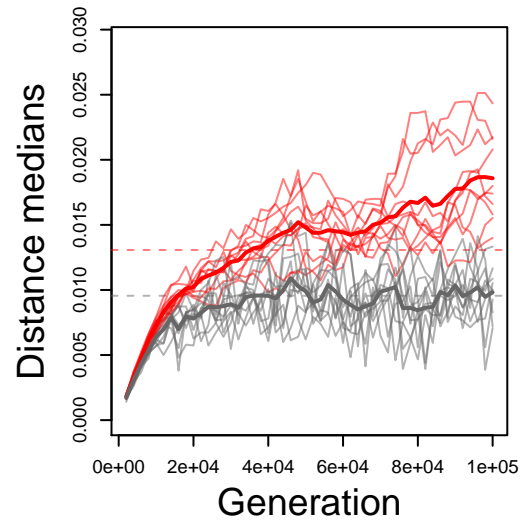

**1/3 times rec**

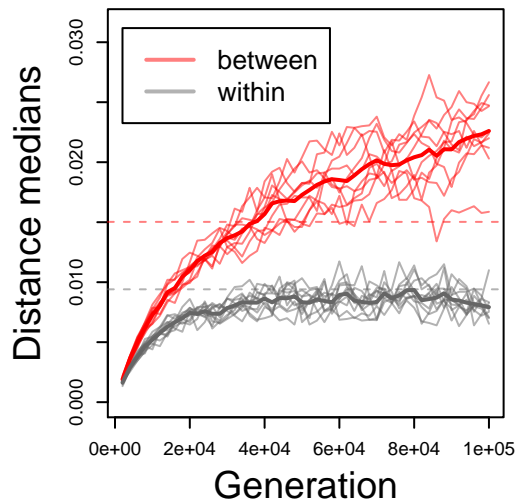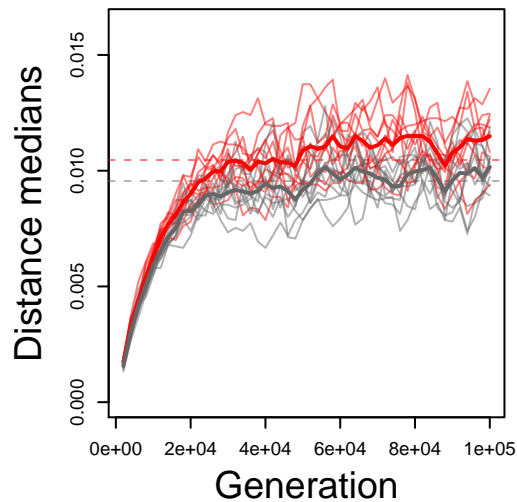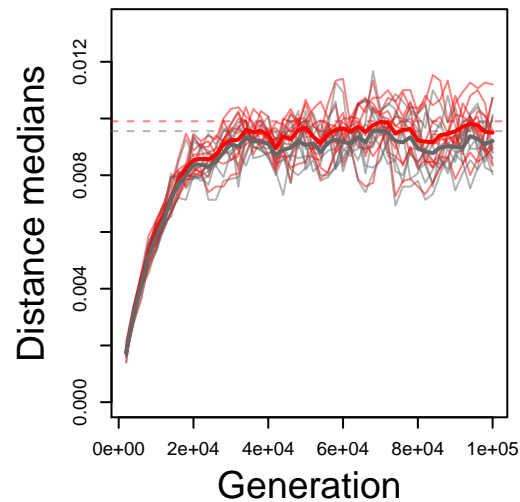

**3 times rec**
