# Supplementary material for: Speciation trajectories in recombining bacterial species
Source: PubMed Central journal article supplement (PMC5542674; doi:10.1371/journal.pcbi.1005640), 2017-07-03

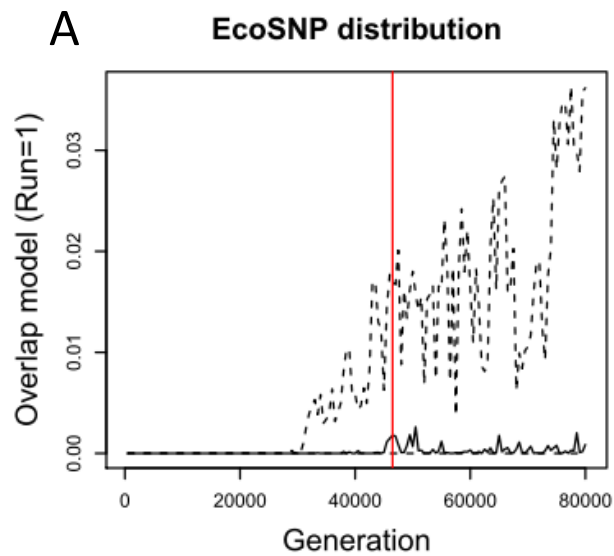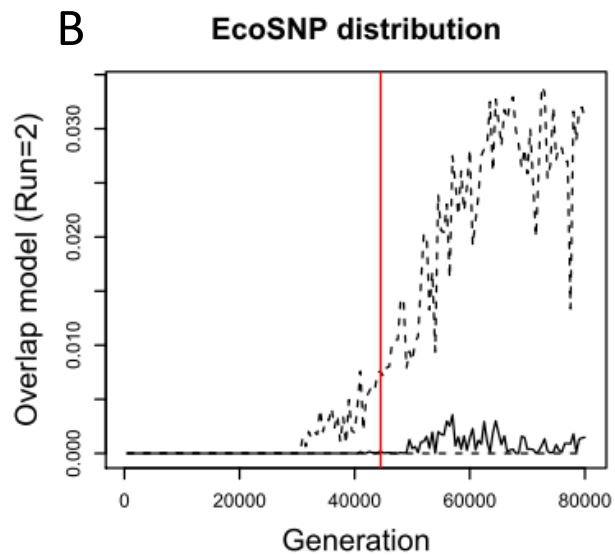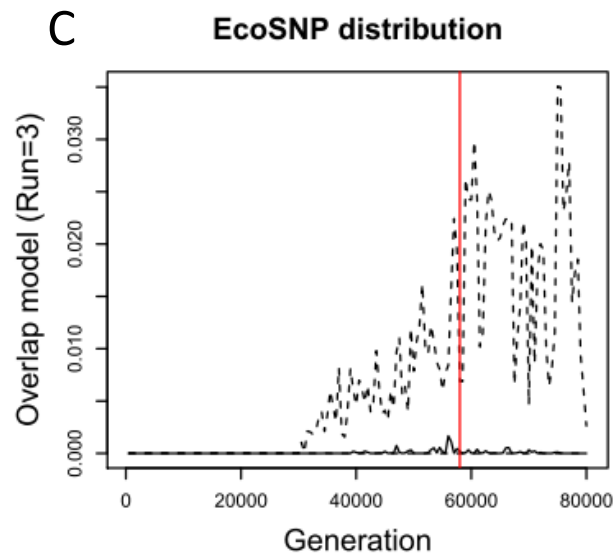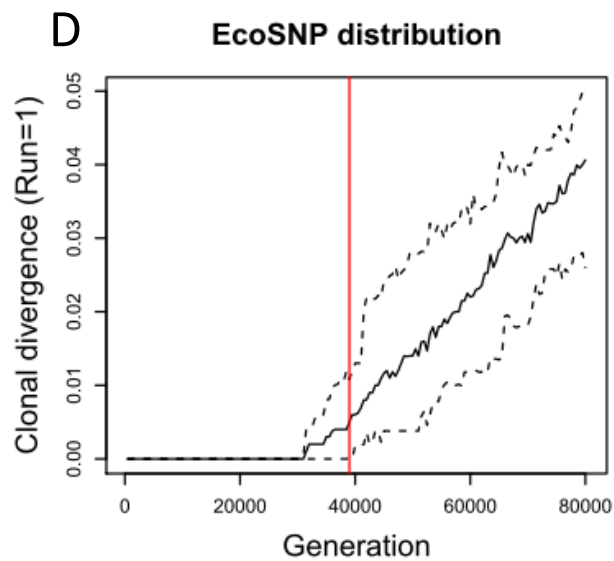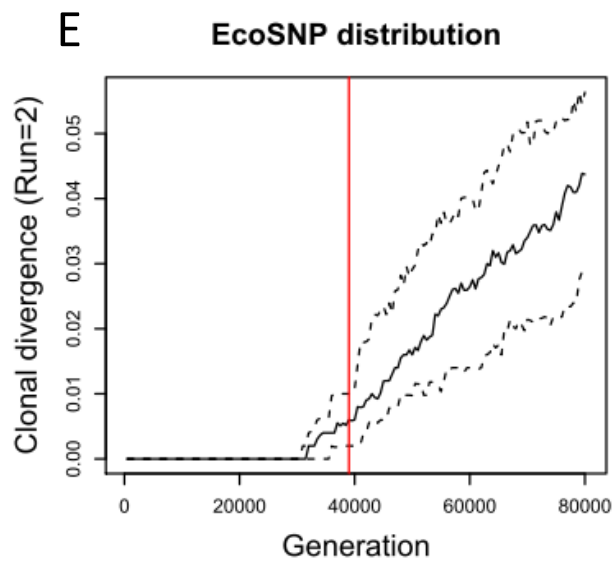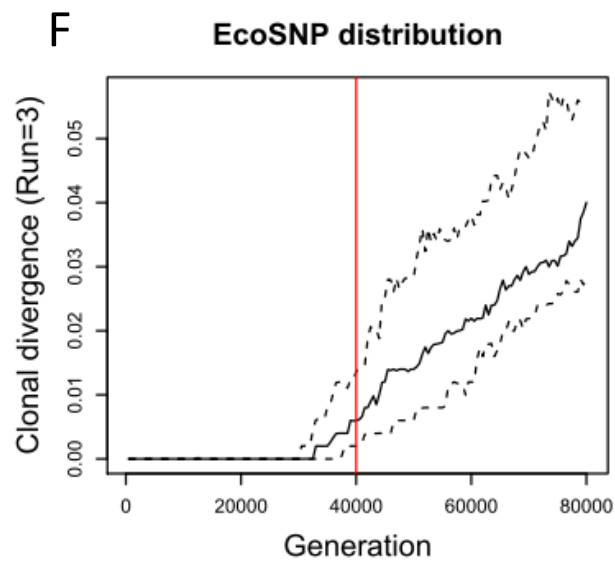

Supplement: pcbi.1005640.s006.pdf [file pcbi.1005640.s006.pdf]
